# Supplementary material for: Productivity of Rainfed Winter Wheat with Direct Sowing and Economic Efficiency of Diversified Fertilization in Arid Region of South Kazakhstan
Source: MDPI journal article supplement (doi:10.3390/agronomy12010111), 2022-01-02
Supplement: s1 [file s1]

**Table S 1.** Monthly precipitation, air temperature and humidity for the years of observation, Shymkent, southern Kazakhstan

| Year                     | months |       |       |       |      |      |      |      |      |      |      |      | average annual air temperature | The sum of positive temperatures for the growing season of winter wheat |
|--------------------------|--------|-------|-------|-------|------|------|------|------|------|------|------|------|--------------------------------|-------------------------------------------------------------------------|
|                          | I      | II    | III   | IV    | V    | VI   | VII  | VIII | IX   | X    | XI   | XII  |                                |                                                                         |
| Air temperature, °C      |        |       |       |       |      |      |      |      |      |      |      |      |                                |                                                                         |
| 2018                     | 0.6    | 1.13  | 6.8   | 13.6  | 18.6 | 24.0 | 25.5 | 26.1 | 20.0 | 12.3 | 3.8  | 2.0  | 12.869                         | -                                                                       |
| 2019                     | 3.0    | 3.0   | 10.8  | 13.7  | 19.9 | 23.9 | 29.7 | 26.8 | 19.7 | 14.1 | 3.1  | 3.0  | 14.225                         | 2533.1                                                                  |
| 2020                     | -0.1   | 4.7   | 10.1  | 14.7  | 20.0 | 24.5 | 27.8 | 25.4 | 19.0 | 11.4 | 2.1  | -2.7 |                                |                                                                         |
| 2021                     | -0.2   | 5.2   | 7.1   | 14.4  | 22.3 | 26.9 | -    | -    | -    | -    | -    | -    |                                |                                                                         |
| Precipitation, mm        |        |       |       |       |      |      |      |      |      |      |      |      | Average monthly rainfall, mm   | Precipitation during the growing season, mm                             |
| 2018                     | 73     | 81    | 81    | 69    | 57   | 19   | 3.1  | 3    | 3.1  | 44.2 | 85.3 | 67.2 | 48.83                          | 196.7                                                                   |
| 2019                     | 80.5   | 74.3  | 30.1  | 138.4 | 23.8 | 14   | 0.7  | 0.0  | 8.5  | 10.0 | 24.3 | 88.1 | 41.06                          | 361.9                                                                   |
| 2020                     | 81.7   | 103.5 | 28.6  | 101.9 | 98.3 | 1.9  | 0.8  | 11.7 | 2.9  | 0    | 67.8 | 30.1 | 44.10                          |                                                                         |
| 2021                     | 22.7   | 91.3  | 162.0 | 36.7  | 33.6 | 2.1  | -    | -    | -    | -    | -    | -    | 58.07                          |                                                                         |
| Relative air humidity, % |        |       |       |       |      |      |      |      |      |      |      |      | Average annual air humidity, % | Average humidity in the growing season                                  |
| 2018                     | -      | -     | -     | -     | -    | -    | -    | -    | 32   | 54   | 73   | 80   | 59.75                          | 69.0                                                                    |
| 2019                     | 78     | 76.0  | 67    | 79    | 49   | 40   | 28   | 27   | 36   | 47   | 71   | 75   | 56.08                          | 52.1                                                                    |
| 2020                     | 89     | 76    | 56    | 65    | 59   | 36   | 32   | 37   | 35   | 40   | 62   | 84   | 55.92                          |                                                                         |
| 2021                     | 72     | 68    | 71    | 52    | 46   | 30   | -    | -    | -    | -    | -    | -    | 56.50                          |                                                                         |
